# Supplementary material
Source: MDPI journal article supplement (https://www.mdpi.com/2073-4352/12/11/1628)
Supplement: s1 [file s1 › crystals-2014747-supplementary.pdf]

## Supporting Information

# Three-Component Covalent Organic Framework Nanosheets for the Detection of MicroRNAs

Bin Xie <sup>1,†</sup>, Yilun Yan <sup>2,†</sup>, Jialin Wu <sup>2</sup>, Xinting Cai <sup>2</sup>, Jiayue Zheng <sup>2</sup>, Yixin Lan <sup>2</sup>,  
Xihao Tang <sup>2,3,\*</sup>, Jun Fan <sup>2,3</sup>, Shengrun Zheng <sup>2,3</sup> and Songliang Cai <sup>2,3,\*</sup>

<sup>1</sup>Zhuhai Rundu Pharmaceutical Co. Ltd., Zhuhai 519040, People's Republic of China

<sup>2</sup>GDMPA Key Laboratory for Process Control and Quality Evaluation of Chiral Pharmaceuticals, School of Chemistry, South China Normal University, Guangzhou 510006, People's Republic of China

<sup>3</sup>Guangzhou Key Laboratory of Analytical Chemistry for Biomedicine, School of Chemistry, South China Normal University, Guangzhou 510006, People's Republic of China

Table S1. Synthetic oligonucleotides used in this study.

| Name             | Sequence                      |
|------------------|-------------------------------|
| Probe DNA (PDNA) | 5'-AACTATACAACCTACTACCTCA-3'  |
| let-7a           | 5'-UGAGGUAGUAGGUUGUAUAGUU-3'  |
| let-7c           | 5'-UGAGGUAGUAGGUUGUAUGGUU-3'  |
| let-7b           | 5'-UGAGGUAGUAGGUUGUGUGGUU-3'  |
| miR221           | 5'-AGCUACAUUGUCUGCUGGGUUUC-3' |

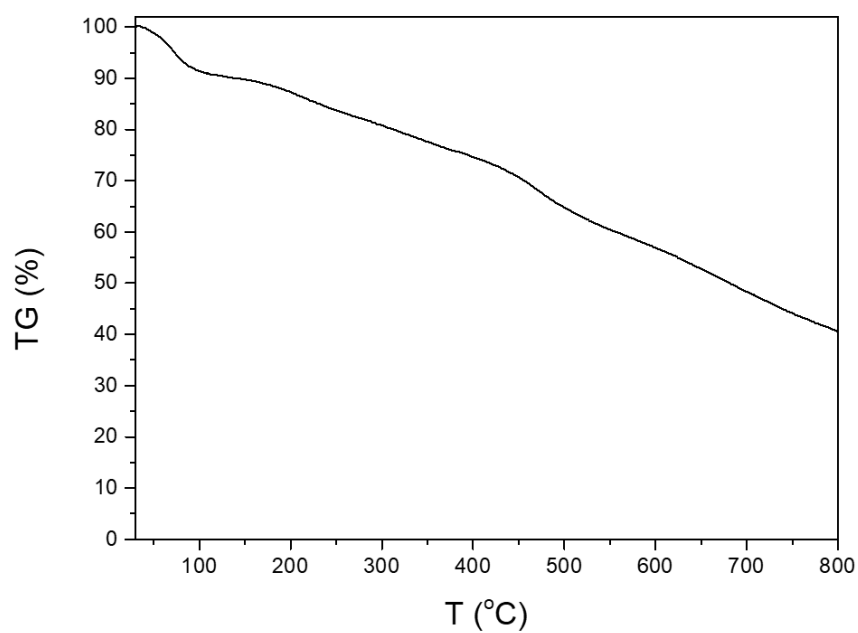

**Figure S1.** TGA curve of EB-TAPB-TFP COF under nitrogen atmosphere.

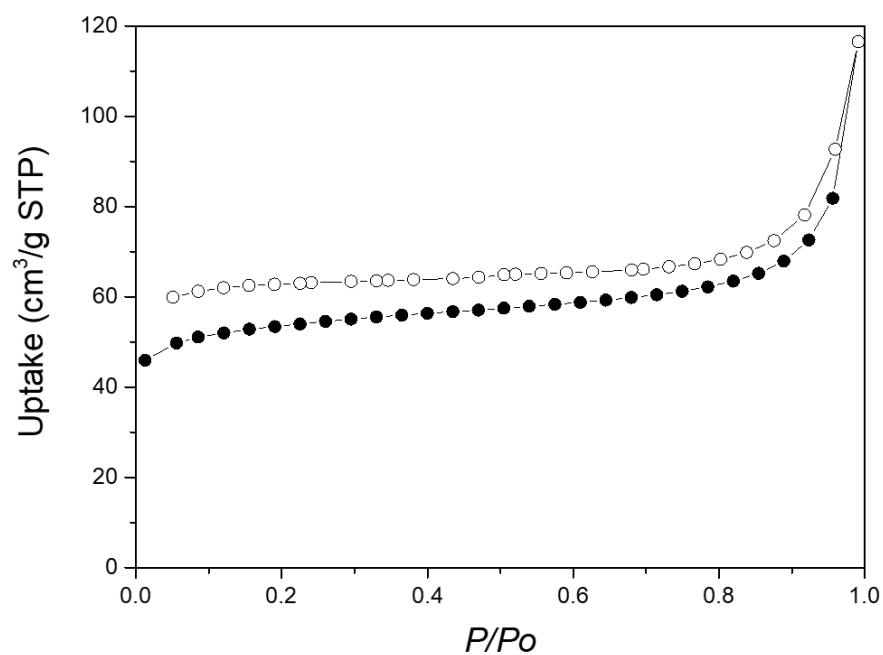

**Figure S2.**  $N_2$  adsorption (filled symbols) and desorption (empty symbols) isotherms of EB-TAPB-TFP COF.

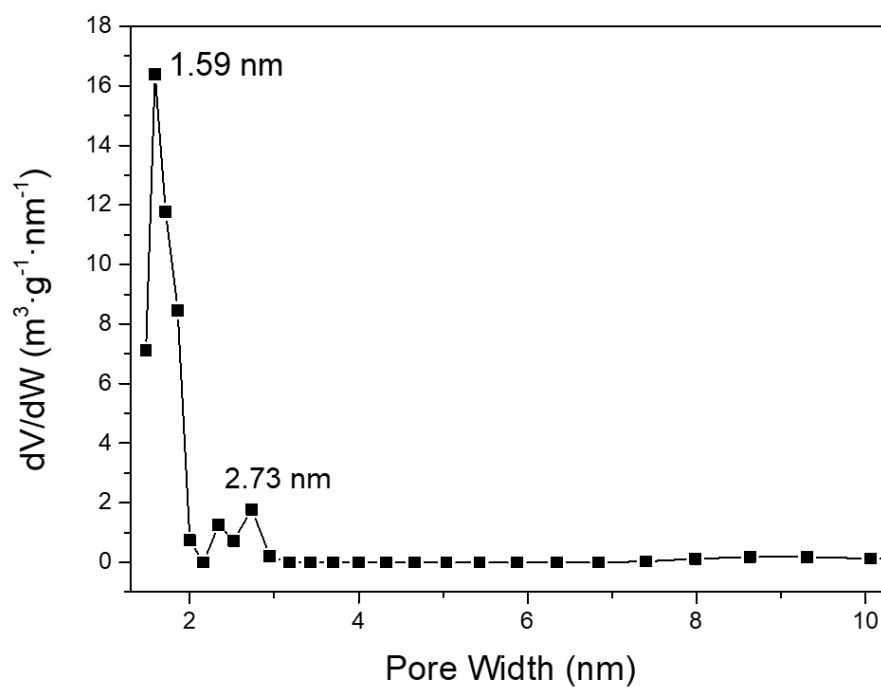

**Figure S3.** Pore size distribution analysis of EB-TAPB-TFP COF.

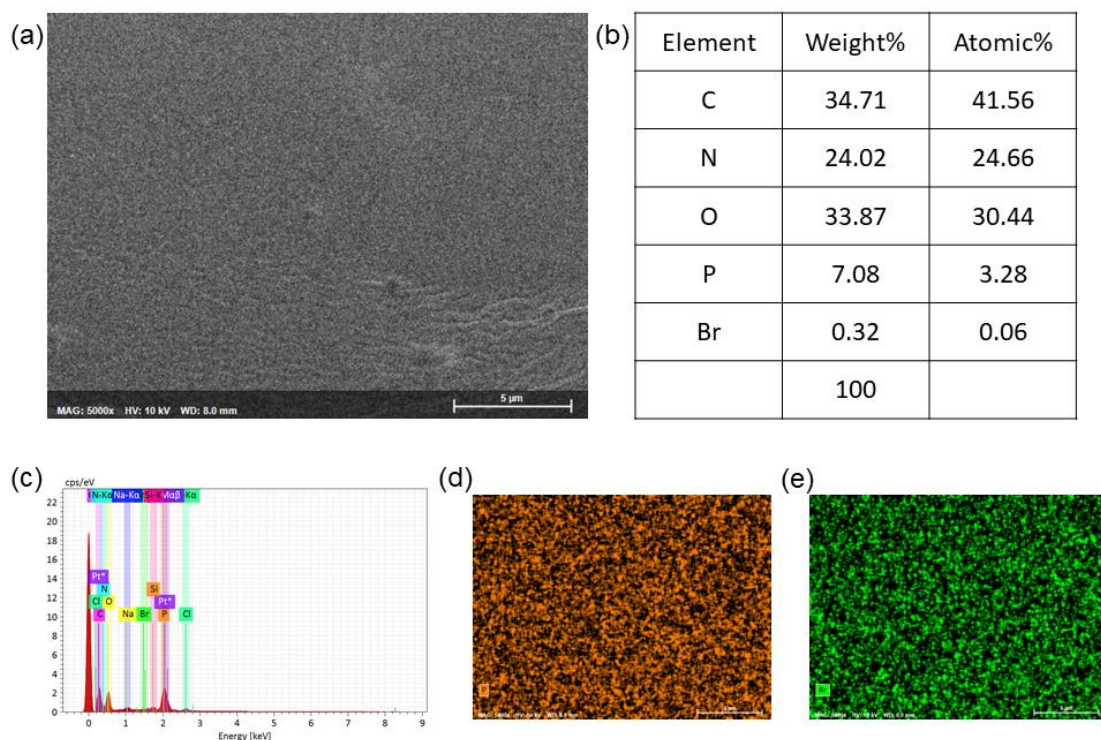

**Figure S4.** (a) SEM image of the EB-TAPB-TFP NSs-PDNA-miRNA heteroduplex hybrid and (b) corresponding elemental contents. (c) Total surface element composition of EB-TAPB-TFP NSs-PDNA-miRNA heteroduplex hybrid by SEM-EDX. Color mapping for (d) phosphorus and (e) bromine by EDX.
